# Supplementary material
Source: PubMed Central journal article supplement (PMC3426721)
Supplement: AEM.01293-12_zam999103664so1.pdf [file AEM.01293-12_zam999103664so1.pdf]

**Supplementary Table 1.** Identification of the proteins differentially expressed during carbon starvation.

| Protein name                                                             | Gene name    | Ro no. | Genetic context        | MASCO T score <sup>a</sup> | Peptides matched | Normalized signal intensity (NV) <sup>b</sup> |      |      |      |      |      |      |
|--------------------------------------------------------------------------|--------------|--------|------------------------|----------------------------|------------------|-----------------------------------------------|------|------|------|------|------|------|
|                                                                          |              |        |                        |                            |                  | ML                                            | TP   | PTP  | ES   | MS   | LS   | LLS  |
| benzoate 1,2-dioxygenase alpha subunit                                   | <i>benA</i>  | 02384  | <i>ben</i> cluster     | 163                        | 14               | 1.70                                          | 1.30 | 0.61 | 0.43 | 0.15 | 0.11 | 0.07 |
| benzoate 1,2-dioxygenase beta subunit                                    | <i>benB</i>  | 02385  | <i>ben</i> cluster     | 87                         | 5                | 1.09                                          | 0.97 | 0.59 | 0.46 | 0.18 | 0.17 | 0.18 |
| benzoate 1,2-dioxygenase reductase subunit                               | <i>benC</i>  | 02386  | <i>ben</i> cluster     | 113                        | 11               | 0.98                                          | 0.81 | 0.35 | 0.21 | 0.02 | N    | N    |
| cis-1,6-dihydroxycyclohexa-3,5-diene-1-carboxylate dehydrogenase         | <i>benD</i>  | 02387  | <i>ben</i> cluster     | 102                        | 8                | 0.56                                          | 0.50 | 0.33 | 0.20 | 0.02 | 0.04 | 0.01 |
| catechol 1,2-dioxygenase                                                 | <i>catA</i>  | 02373  | <i>cat</i> cluster     | 84                         | 9                | 3.50                                          | 3.28 | 2.40 | 1.82 | 0.67 | 0.36 | 0.19 |
| muconate cycloisomerase                                                  | <i>catB</i>  | 02372  | <i>cat</i> cluster     | 60                         | 7                | 0.42                                          | 0.35 | 0.23 | 0.11 | 0.02 | 0.01 | 0.01 |
| 3-oxoacid CoA-transferase, subunit A                                     | <i>pcaI</i>  | 01334  | <i>pca</i> cluster     | 80                         | 8                | 0.35                                          | 0.32 | 0.30 | 0.27 | 0.10 | 0.04 | 0.02 |
| protocatechuate dioxygenase alpha subunit                                | <i>pcaG</i>  | 01336  | <i>pca</i> cluster     | 60                         | 4                | 0.26                                          | 0.28 | 0.25 | 0.18 | 0.04 | 0.05 | 0.05 |
| 3-oxoacid CoA-transferase                                                | <i>pcaJ</i>  | 01333  | <i>pca</i> cluster     | 119                        | 7                | 0.10                                          | 0.12 | 0.10 | 0.02 | 0.02 | 0.02 | 0.02 |
| Acetyl-CoA C-acyltransferase                                             | <i>pcaF</i>  | 01340  | <i>pca</i> cluster     | 151                        | 13               | 0.28                                          | 0.39 | 0.42 | 0.39 | 0.30 | 0.20 | 0.02 |
| 3-carboxy-cis,cis-muconate cycloisomerase                                | <i>pcaB</i>  | 01337  | <i>pca</i> cluster     | 211                        | 5                | 0.10                                          | 0.11 | 0.07 | 0.08 | 0.08 | 0.07 | N    |
| protocatechuate dioxygenase beta subunit                                 | <i>pcaH</i>  | 01335  | <i>pca</i> cluster     | 349                        | 7                | 0.14                                          | 0.20 | 0.08 | 0.08 | 0.02 | 0.01 | 0.01 |
| 3-oxoadipate enol-lactone hydrolase/4-carboxymuconolactone decarboxylase | <i>pcaL</i>  | 01338  | <i>pca</i> cluster     | 27                         | 4                | 0.21                                          | 0.20 | 0.10 | 0.06 | 0.08 | 0.06 | 0.03 |
| transcriptional regulator, IclR family                                   | <i>pcaR</i>  | 01339  | <i>pca</i> cluster     | 95                         | 7                | 0.03                                          | 0.04 | 0.05 | 0.06 | 0.05 | 0.03 | 0.02 |
| biphenyl 2,3-dioxygenase alpha subunit                                   | <i>bphAa</i> | 08060  | <i>bph</i> cluster     | 64                         | 6                | N                                             | N    | N    | N    | 0.48 | 0.54 | 0.15 |
| cis-3-phenylcyclohexa                                                    | <i>bphB2</i> | 10126  | <i>bph/etb</i> cluster | 184                        | 14               | N                                             | N    | N    | N    | 0.03 | 0.03 | 0.13 |

|                                                         |               |                 |                                                 |     |    |      |      |      |      |      |      |       |
|---------------------------------------------------------|---------------|-----------------|-------------------------------------------------|-----|----|------|------|------|------|------|------|-------|
| -3,5-diene-1,2-diol dehydrogenase                       | <i>bphD1</i>  | 10136           | <i>bph/etb</i> cluster                          | 93  | 13 | N    | N    | N    | N    | 0.10 | 0.08 | 0.03  |
| 2,6-dioxo-6-phenylhexa-3-enoate hydrolase               | <i>etbAa1</i> | 10133           | <i>bph/etb</i> cluster                          | 71  | 13 | N    | N    | N    | N    | 0.47 | 0.45 | 0.26  |
| ethylbenzene dioxygenase alpha subunit                  | <i>etbD1</i>  | 08044           | <i>bph/etb</i> cluster                          | 97  | 7  | 0.01 | 0.01 | 0.02 | 0.01 | 0.24 | 0.29 | 0.18  |
| 2-hydroxy-6-oxohepta-2,4-dienoate hydrolase             | <i>etbD2</i>  | 10146           | <i>bph/etb</i> cluster                          | 132 | 9  | 0.01 | 0.01 | 0.02 | 0.02 | 0.27 | 0.26 | 0.10  |
| 2,6-dioxo-6-phenylhexa-3-enoate hydrolase               | <i>padAd1</i> | 08162/<br>12013 | <i>pad</i> clusters                             | 52  | 11 | 0.02 | 0.05 | 0.07 | 0.09 | 0.03 | 0.02 | N     |
| phthalate 3,4-dioxygenase, ferredoxin reductase subunit | <i>patE</i>   | 08169           | <i>pat</i> cluster                              | 66  | 9  | 0.04 | 0.04 | 0.09 | 0.12 | 0.07 | 0.06 | 0.03  |
| phthalate ester hydrolase                               |               |                 |                                                 |     |    |      |      |      |      |      |      |       |
| propane monooxygenase hydroxylase large subunit         |               | 00441           | large cluster with phenol hydroxylase and GroEL | 69  | 12 | 0.02 | 0.03 | 0.03 | 0.04 | 0.13 | 0.68 | 0.38  |
| probable 1,3-propanediol dehydrogenase                  |               | 06057           | ATP-dependent protease                          | 160 | 14 | 0.05 | 0.03 | 0.15 | 0.24 | 0.24 | 0.56 | 0.29  |
| CO dehydrogenase, medium subunit                        |               | 04975           | CODH                                            | 85  | 7  | 0.09 | 0.13 | 0.08 | 0.12 | 0.22 | 0.20 | 0.19  |
| <sup>13</sup> C dehydrogenase, maturation factor        |               | 05229           | CODH                                            | 71  | 11 | N    | N    | N    | N    | 0.17 | 0.38 | 0.49  |
| <sup>13</sup> C dehydrogenase, medium subunit           |               | 05230           | CODH                                            | 89  | 12 | 0.04 | 0.07 | 0.03 | 0.04 | 0.18 | 0.20 | 0.43  |
| <sup>13</sup> C dehydrogenase, large subunit            |               | 05232           | CODH                                            | 147 | 26 | N    | N    | 0.05 | 0.04 | 0.17 | 0.20 | 0.46  |
| 5,10-methylene tetrahydromethanopterin reductase        |               | 03459           | single gene                                     | 145 | 9  | 0.02 | 0.05 | 0.12 | 0.20 | 0.32 | 0.35 | 0.39  |
| 5,10-methylene tetrahydromethanopterin reductase        |               | 02204           | not clear                                       | 58  | 6  | 0.23 | 0.24 | 0.28 | 0.31 | 0.34 | 0.4  | 0.28  |
| 5,10-methylene tetrahydromethanopterin reductase        |               | 02495           | monooxygenase                                   | 75  | 12 | 0.02 | 0.01 | 0.03 | 0.02 | 0.07 | N    | N     |
| citrate synthase                                        | <i>citA4</i>  | 04993,<br>08812 | phosphoserine transaminase                      | 44  | 9  | 0.09 | 0.1  | 0.03 | 0.01 | 0.02 | 0.01 | 0.004 |

|                                         |              |       |                                  |     |    |      |      |      |      |      |      |      |
|-----------------------------------------|--------------|-------|----------------------------------|-----|----|------|------|------|------|------|------|------|
|                                         |              |       | se                               |     |    |      |      |      |      |      |      |      |
| citrate synthase                        |              | 04998 | peptidylprolyl isomerase         | 117 | 11 | 0.03 | 0.05 | 0.05 | 0.05 | 0.03 | 0.02 | N    |
| isocitrate dehydrogenase                |              | 06238 | Arabinose efflux permease        | 95  | 11 | 0.16 | 0.10 | 0.02 | N    | N    | N    | N    |
| succinate-CoA ligase, alpha subunit     | <i>sucD</i>  | 05573 | <i>suc</i> cluster               | 77  | 9  | 1.00 | 0.85 | 0.85 | 0.80 | 0.67 | 0.58 | 0.42 |
| succinate-CoA ligase, beta subunit      | <i>sucC</i>  | 05574 | <i>suc</i> cluster               | 139 | 12 | 1.07 | 0.82 | 0.79 | 1.03 | 0.92 | 0.58 | 0.50 |
| succinate dehydrogenase                 | <i>sdhA2</i> | 06246 | <i>sdh</i> cluster               | 71  | 12 | 0.60 | 0.45 | 0.33 | 0.31 | 0.32 | 0.19 | 0.27 |
| fumarate hydratase                      |              | 08824 | succinate dehydrogenase          | 206 | 10 | N    | N    | 0.01 | 0.01 | 0.01 | 0.02 | 0.02 |
| malate dehydrogenase                    | <i>fabF</i>  | 06000 | single gene                      | 95  | 7  | 0.20 | 0.24 | 0.25 | 0.16 | 0.06 | 0.02 | 0.06 |
| dihydrolipoyl dehydrogenase             | <i>dldH1</i> | 02140 | Hypothetical lipid metabolism    | 74  | 10 | 0.09 | 0.04 | N    | N    | N    | N    | N    |
| isocitrate lyase                        |              | 02122 | pentose phosphate pathway        | 132 | 15 | 0.20 | 0.22 | 0.74 | 0.75 | 0.59 | 0.38 | 0.46 |
| glucose-6-phosphate dehydrogenase       | <i>zwf4</i>  | 07184 | RNA helicase                     | 120 | 12 | 0.03 | 0.02 | 0.03 | 0.04 | 0.05 | 0.05 | 0.11 |
| phosphogluconate dehydrogenase          | <i>gnd3</i>  | 07246 | Amidotransferase <i>gat</i>      | 126 | 14 | 0.08 | 0.06 | 0.15 | 0.23 | 0.39 | 0.43 | 0.50 |
| 6-phosphofruktokinase                   | <i>pfkA</i>  | 06479 | glutamate synthase               | 84  | 13 | 0.02 | 0.04 | 0.03 | 0.03 | 0.01 | N    | N    |
| pyruvate kinase                         | <i>pyk1</i>  | 01007 | Hypothetical                     | 63  | 10 | 0.29 | 0.29 | 0.29 | 0.27 | 0.30 | 0.18 | 0.19 |
| glucose-6-phosphate isomerase           |              | 05567 | long-chain-fatty-acid-CoA ligase | 159 | 15 | 0.08 | 0.09 | 0.10 | 0.11 | 0.10 | 0.12 | 0.11 |
| phosphoglycerate mutase                 | <i>gpmA</i>  | 02070 | single gene                      | 93  | 7  | 0.02 | 0.05 | 0.13 | 0.09 | 0.09 | 0.12 | 0.36 |
| glycosyltransferase                     |              | 05974 | glycosyltransferase              | 84  | 12 | N    | 0.02 | 0.05 | 0.06 | 0.10 | 0.09 | 0.08 |
| glycosyltransferase                     |              | 05764 | transcriptional regulator        | 56  | 6  | 0.02 | 0.02 | 0.03 | 0.05 | 0.15 | 0.18 | 0.24 |
| °nucleoside-diphosphate-sugar epimerase |              | 00180 | glycosidase                      | 81  | 8  | 0.01 | 0.03 | 0.05 | 0.03 | 0.09 | 0.07 | 0.11 |
| 1,4-alpha-glucan branching enzyme       | <i>glgB</i>  | 01449 | hypothetical genes               | 250 | 25 | 0.03 | 0.03 | 0.04 | 0.05 | 0.07 | 0.11 | 0.04 |
| glycoside hydrolase                     |              | 04568 | Single                           | 75  | 10 | N    | N    | 0.01 | 0.02 | 0.03 | 0.03 | 0.04 |
| carboxyvinyl-                           | <i>prpB</i>  | 02162 |                                  | 47  | 4  | 0.06 | 0.07 | 0.12 | 0.22 | 0.23 | 0.24 | 0.23 |

|                                                           |              |       |                                          |     |    |      |      |      |      |      |      |      |  |
|-----------------------------------------------------------|--------------|-------|------------------------------------------|-----|----|------|------|------|------|------|------|------|--|
| carboxyphosphate phosphorylmutase                         |              |       | gene                                     |     |    |      |      |      |      |      |      |      |  |
| succinate-semialdehyde dehydrogenase (NAD(P)+)            | <i>gabD4</i> | 05568 | Single gene                              | 111 | 15 | 0.06 | 0.07 | 0.1  | 0.14 | 0.23 | 0.23 | 0.42 |  |
| succinate-semialdehyde dehydrogenase (NAD(P)+)            | <i>gabD3</i> | 04543 | <i>gabT2</i>                             | 110 | 7  | 0.05 | 0.16 | 0.34 | 0.29 | 0.17 | 0.19 | 0.21 |  |
| 60kDa chaperonin GroEL chaperone protein                  | <i>groL2</i> | 02146 | universal stress protein                 | 143 | 12 | 0.83 | 0.69 | 0.60 | 0.60 | 0.65 | 0.63 | N    |  |
| 60 kDa chaperonin GroEL                                   | <i>groEL</i> | 06190 | 10 kDa chaperonin                        | 138 | 12 | 0.81 | 0.67 | 1.20 | 0.93 | 0.71 | 0.63 | 0.34 |  |
| heat shock protein Hsp70                                  | <i>groL1</i> | 00448 | propane monooxygenase                    | 81  | 7  | N    | N    | 0.61 | 0.37 | 0.11 | 1.45 | N    |  |
| universal stress protein                                  | <i>dnaK1</i> | 05497 | chaperones : grpE1, dnaJ2                | 80  | 15 | 1.01 | 1.10 | 0.71 | 0.72 | 1.07 | 1.99 | 1.36 |  |
| universal stress protein                                  |              | 02263 | universal stress protein, oxidoreductase | 278 | 8  | 0.03 | 0.03 | 0.05 | 0.05 | 0.04 | 0.03 | 0.03 |  |
| universal stress protein                                  |              | 04893 | pseudouridylate synthase                 | 71  | 6  | 0.08 | 0.06 | 0.06 | 0.12 | 0.12 | 0.19 | 0.18 |  |
| type I restriction-modification system, methyltransferase | <i>hsdM</i>  | 11151 | restriction-modification system          | 60  | 13 | N    | N    | N    | N    | 0.01 | 0.07 | N    |  |
| thiocyanate hydrolase gamma subunit                       |              | 04428 | thiocyanate hydrolase subunits           | 85  | 7  | N    | N    | N    | 0.08 | 0.23 | 0.21 | 0.11 |  |
| epoxide hydrolase                                         |              | 08833 | hypothetical genes                       | 98  | 11 | 0.17 | 0.16 | 0.19 | 0.23 | 0.25 | 0.27 | 0.27 |  |
| superoxide dismutase                                      | <i>sodA</i>  | 04009 | amidotransferase                         | 62  | 6  | 1.08 | 0.90 | 1.10 | 1.19 | 1.40 | 1.38 | 1.62 |  |
| heme superoxide dismutase                                 |              | 06860 | Heme biosynthesis, oxidoreductase        | 73  | 6  | 0.19 | 0.19 | 0.18 | 0.26 | 0.25 | 0.31 | 0.39 |  |
| catalase                                                  | <i>katE</i>  | 04309 | Fe(3+) uptake regulator                  | 77  | 14 | 0.02 | 0.05 | 0.05 | 0.07 | 0.04 | 0.01 | 0.02 |  |
| ATP-dependent Clp protease                                |              | 01371 | clpX , FKBP-type                         | 59  | 7  | 0.25 | 0.25 | 0.40 | 0.41 | 0.30 | 0.43 | 0.50 |  |

|                                        |             |       |                                                                        |     |    |                   |                   |      |      |      |      |      |
|----------------------------------------|-------------|-------|------------------------------------------------------------------------|-----|----|-------------------|-------------------|------|------|------|------|------|
| prolyl aminopeptidase                  |             | 01171 | bacterial trigger factor<br><i>panB</i> , coenzyme metabolism          | 8   | 74 | 7                 | 0.01              | 0.03 | 0.03 | 0.02 | 0.01 | 0.09 |
| FeS assembly ATPase                    | <i>sufC</i> | 07198 | <i>suf</i> cluster                                                     | 76  | 8  |                   | 0.21              | 0.17 | 0.17 | 0.14 | 0.11 | 0.09 |
| bacterioferritin                       |             | 04043 | Bacterioferritin-associated ferredoxin transcriptional regulator, LytR | 80  | 6  | 0.00 <sub>2</sub> | 0.02              | 0.11 | 0.18 | 0.37 | 0.28 | 0.41 |
| bacterioferritin                       |             | 04028 | cell division                                                          | 40  | 5  | 0.03              | 0.04              | 0.02 | 0.04 | 0.07 | 0.04 | 0.09 |
| cell division initiation protein       |             | 01080 | cell division                                                          | 135 | 11 | 0.00 <sub>2</sub> | 0.00 <sub>5</sub> | 0.01 | 0.07 | 0.11 | 0.08 | 0.03 |
| sensor kinase, two-component system    |             | 02255 | single gene                                                            | 51  | 8  | 0.11              | 0.11              | 0.08 | 0.04 | N    | N    | N    |
| transcriptional activator TenA         |             | 01597 | ABC-type nitrate/sulfonate/bicarbonate transport                       | 60  | 5  | 0.16              | 0.18              | 0.14 | 0.10 | 0.04 | 0.04 | 0.06 |
| transcriptional regulator; TetR family |             | 08719 | hypothetical genes                                                     | 31  | 5  | 0.06              | 0.09              | 0.09 | 0.12 | 0.06 | 0.06 | 0.07 |
| transcriptional regulator, TetR family |             | 10228 | single gene (carveol dehydrogenase)                                    | 53  | 7  | 0.03              | 0.04              | 0.03 | 0.06 | 0.04 | 0.02 | 0.01 |
| conserved hypothetical protein         |             | 00906 | transcriptional regulator                                              | 81  | 8  | 0.04              | 0.04              | 0.13 | 0.09 | 0.18 | 0.21 | 0.23 |
| RNA polymerase sigma factor G          | <i>sigG</i> | 05361 | ArsR                                                                   | 122 | 12 | 0.07              | 0.07              | 0.11 | 0.13 | 0.17 | 0.14 | 0.18 |
| transcriptional regulator, GntR family |             | 03232 | probable multidrug resistance transporter                              | 51  | 5  | 0.02              | 0.04              | 0.05 | 0.13 | 0.06 | 0.03 | 0.04 |
| iron dependent transcription repressor |             | 06652 | single gene                                                            | 62  | 6  | 0.02              | 0.06              | 0.07 | 0.12 | 0.17 | 0.12 | 0.06 |
| transcriptional regulator; IclR family |             | 02458 | carbohydrate kinase, PfkB family                                       | 52  | 4  | N                 | N                 | N    | N    | N    | 0.01 | N    |

<sup>a</sup>MASCOT generated Probability Based Mowse Score. The scores greater than 55 are significant (p<0.05);

<sup>b</sup>spot signal intensities were normalized and averaged over three replica gels (each from independent

experiment). <sup>c</sup>Protein annotation was edited. N, not detected.
